# Supplementary material
Source: HighWire-hosted journal article supplement (https://care.diabetesjournals.org/content/suppl/2013/01/03/dc12-1731)
Supplement: DC121731SupplementaryData.pdf [file DC121731SupplementaryData.pdf]

SUPPLEMENTARY DATA

**Supplementary Table 1.** Cross-sectionals correlations between adiponectin levels at 1st or 2nd trimester and characteristics of participants.

| Characteristics at <b>1<sup>st</sup> trimester</b> | Correlations with adiponectin levels at <b>1<sup>st</sup> trimester</b> |                |
|----------------------------------------------------|-------------------------------------------------------------------------|----------------|
|                                                    | r                                                                       | <i>P</i> value |
| Age (years)                                        | -0.01                                                                   | 0.91           |
| WC (cm)                                            | -0.24                                                                   | <0.0001        |
| BMI (kg/m <sup>2</sup> )                           | -0.30                                                                   | <0.0001        |
| BFP (%)                                            | -0.28                                                                   | <0.0001        |
| Physical activity (kcal/kg/day)                    | 0.04                                                                    | 0.43           |
| Characteristics at <b>2<sup>nd</sup> trimester</b> | Correlations with adiponectin levels at <b>2<sup>nd</sup> trimester</b> |                |
|                                                    | r                                                                       | <i>P</i> value |
| BMI (kg/m <sup>2</sup> )                           | -0.26                                                                   | <0.0001        |
| BFP (%)                                            | -0.23                                                                   | <0.0001        |
| Physical activity (kcal/kg/day)                    | -0.03                                                                   | 0.57           |
| Triglycerides (mmol/L)                             | -0.28                                                                   | <0.0001        |
| HDL-Cholesterol (mmol/L)                           | 0.33                                                                    | <0.0001        |
| LDL-Cholesterol (mmol/L)                           | 0.11                                                                    | 0.02           |
| Total cholesterol (mmol/L)                         | 0.10                                                                    | 0.03           |

SUPPLEMENTARY DATA

**Supplementary Table 2.** Glycemic regulation of pregnant women with normal glucose tolerance (NGT) and pregnant women who developed gestational diabetes mellitus (GDM).

|                                 | NGT                       | GDM                       | P value* |
|---------------------------------|---------------------------|---------------------------|----------|
| n                               | 407                       | 38                        |          |
| <b>1<sup>st</sup> trimester</b> |                           |                           |          |
| Glucose post 50g (mmol/L)       | 5.4 ± 1.2                 | 6.8 ± 1.1                 | <0.0001  |
| HbA <sub>1c</sub> (%)           | 5.2 ± 0.3                 | 5.4 ± 0.3                 | 0.001    |
| <b>2<sup>nd</sup> trimester</b> |                           |                           |          |
| HbA <sub>1c</sub> (%)           | 5.0 ± 0.3                 | 5.2 ± 0.4                 | 0.001    |
| Fasting insulin (μU/ml)         | 7.43 [5.22-9.95]          | 8.67 [6.43-15.99]         | 0.006    |
| 1-h insulin (μU/ml)             | 51.43 [38.05-68.43]       | 57.92 [40.31-85.97]       | 0.049    |
| 2-h insulin (μU/ml)             | 41.79 [27.63-59.83]       | 54.91 [42.50-96.69]       | 0.0002   |
| AUC insulin                     | 4611.08 [3434.28-6183.06] | 5649.49 [4069.57-8420.63] | 0.005    |
| Fasting glucose (mmol/L)        | 4.1 [3.9-4.4]             | 4.7 [4.1-5.1]             | <0.0001  |
| 1-h glucose (mmol/L)            | 6.9 ± 1.3                 | 9.9 ± 1.7                 | <0.0001  |
| 2-h glucose (mmol/L)            | 5.6 ± 1.1                 | 8.3 ± 1.5                 | <0.0001  |
| AUC glucose                     | 707.6 ± 103.7             | 987.8 ± 118.2             | <0.0001  |
| HOMA-IR                         | 1.4 [0.9-1.9]             | 1.7 [1.2-3.4]             | 0.0002   |
| HOMA-B                          | 225.7 [153.3-355.5]       | 181.7 [126.0-234.1]       | 0.01     |
| Matsuda index                   | 7.5 [5.6-10.4]            | 5.3 [3.3-7.2]             | <0.0001  |
| Total AUC <sub>ins/gluc</sub>   | 6.5 [5.1-8.6]             | 5.4 [4.4-8.5]             | 0.11     |
| ISSI-2                          | 864.4 [681.8-1119.1]      | 493.5 [403.4-583.2]       | <0.0001  |

Data are presented as mean ± SD or median (interquartile range). Variables not normally distributed were log-transformed. \*Independent *t* test for continuous variables. For HbA<sub>1c</sub> at 2<sup>nd</sup> trimester: n = 405 for NGT and 38 for GDM. For 1-h insulin, AUC insulin, Matsuda index, total AUC<sub>ins/gluc</sub> and ISSI-2: n = 406 for NGT and 38 for GDM.
